# Supplementary material for: Is Better Knowledge about Health Benefits of Dietary Fiber Related to Food Labels Reading Habits? A Croatian Overview
Source: MDPI journal article supplement (doi:10.3390/foods11152347), 2022-08-05
Supplement: s1 [file s1]

## Supplementary Materials:

**Supplemental Table S1.** Frequency of food label reading in accordance with sociodemographic factors of subjects; N (%).

| Variable | Scoring    | Sex        |            | Living environment |             | Education      |                  |                   |
|----------|------------|------------|------------|--------------------|-------------|----------------|------------------|-------------------|
|          |            | Female     | Male       | Rural              | Urban       | Primary school | Secondary school | University degree |
| RFL 1†   | Never      | 102 (6.0)  | 134 (16.4) | 68(12.3%)          | 167(8.6)    | 12(22.2)       | 137 (11.3)       | 86 (6.9)          |
|          | Rarely     | 258 (15.2) | 165 (20.2) | 99 (17.9)          | 317 (16.3)  | 15 (27.8)      | 219 (18.1)       | 189 (15.2)        |
|          | Sometimes  | 472 (27.8) | 211(25.8)  | 176 (31.8)         | 502 (25.9)  | 17 (31.5)      | 337(27.8)        | 326 (26.2)        |
|          | Frequently | 566 (33.3) | 198 (24.2) | 148 (26.8)         | 608 (31.3)  | 6 (11.1)       | 341 (28.2)       | 417 (33.5)        |
|          | Always     | 300 (17.7) | 109 (13.3) | 62 (11.2)          | 346 (17.8)  | 4 (7.4)        | 177 (14.6)       | 227 (18.2)        |
|          | p*         | <0.001     |            | <0.001             |             | <0.001         |                  |                   |
| RFL 2†   | Never      | 217 (12.8) | 226 (27.6) | 124 (22.5)         | 317 (16.3)  | 21 (38.9)      | 250 (20.7)       | 171 (13.7)        |
|          | Rarely     | 355 (20.9) | 204 (24.9) | 127 (23.0)         | 425 (21.9)  | 13 (24.1)      | 282 (23.3)       | 263 (21.1)        |
|          | Sometimes  | 507 (29.9) | 194 (23.7) | 164 (29.7)         | 531 (27.4)  | 12 (22.2)      | 347 (28.7)       | 341 (27.4)        |
|          | Frequently | 406 (24.0) | 123 (15.0) | 88 (15.9)          | 435 (22.4)  | 4 (7.4)        | 217 (18.0)       | 307 (24.6)        |
|          | Always     | 210 (12.4) | 71 (8.7)   | 49 (8.9)           | 231(11.9)   | 4 (7.4)        | 112 9.3)         | 164 (13.2)        |
|          | p*         | <0.001     |            | <0.001             |             | <0.001         |                  |                   |
| RFL 3†   | Never      | 488 (28.8) | 403 (49.5) | 209 (37.9)         | 678 (35.1)  | 27 (50.0)      | 464(38.5)        | 399 (32.2)        |
|          | Rarely     | 540 (31.9) | 199 (24.4) | 160 (29.0)         | 571(29.6)   | 13 (24.1)      | 343 (28.4)       | 381 (30.7)        |
|          | Sometimes  | 464 (27.4) | 143 (17.6) | 130 (23.6)         | 472 (24.4)  | 9 (16.7)       | 282 (23.4)       | 316 (25.5)        |
|          | Frequently | 144 (8.5)  | 53 (6.5)   | 35 (6.3)           | 158 (8.2)   | 4 (7.4)        | 87 (7.2)         | 105 (8.5)         |
|          | Always     | 56 (3.3)   | 16 (2.0)   | 18 (3.3)           | 53 (2.7)    | 1 (1.9)        | 30 (2.5)         | 40 (3.2)          |
|          | p*         | <0.001     |            | 0.497              |             | 0.034          |                  |                   |
| RFL 4†   | Never      | 178 (10.5) | 171(20.9)  | 84 (15.2)          | 263 (13.6)  | 18 (34.0)      | 201(16.7)        | 129 (10.4)        |
|          | Rarely     | 219 (13.0) | 121 (14.8) | 88 (16.0)          | 250 (12.9)  | 6 (11.3)       | 188 (15.6)       | 146 (11.7)        |
|          | Sometimes  | 596 (35.3) | 265 (32.3) | 178 (32.3)         | 675 (34.8)  | 10 (18.9)      | 400 (33.1)       | 449 (36.1)        |
|          | Frequently | 497 (29.4) | 194 (23.7) | 147 (26.7)         | 538 (27.8)  | 10 (18.9)      | 311 (25.8)       | 368 (29.6)        |
|          | Always     | 200 (11.8) | 69 (8.4)   | 54 (9.8)           | 212 (10.9)  | 9 (17.0)       | 107 (8.9)        | 153 (12.3)        |
|          | p*         | <0.001     |            | 0.254              |             | <0.001         |                  |                   |
| RFL 5†   | Never      | 473 (27.9) | 341 (41.6) | 169 (30.6)         | 639 (32.9%) | 20 (37.7)      | 408 (33.7)       | 385 (30.9)        |
|          | Rarely     | 419 (24.7) | 181 (22.1) | 145 (26.3)         | 452 (23.3)  | 19 (35.8)      | 290 (23.9)       | 290 (23.3)        |
|          | Sometimes  | 418 (24.6) | 154 (18.8) | 125 (22.6)         | 437 (22.5)  | 6 (11.3)       | 275 (22.7)       | 289 (23.2)        |
|          | Frequently | 250 (14.7) | 91 (11.1)  | 67 (12.1)          | 271 (13.9)  | 4 (7.5)        | 147 (12.1)       | 189 (15.2)        |
|          | Always     | 138 (8.1)  | 52 (6.3)   | 46 (8.3)           | 144 (7.4)   | 4 (7.5)        | 92 (7.6)         | 94 (7.5)          |
|          | p*         | <0.001     |            | 0.429              |             | 0.079          |                  |                   |

\*Chi-Square test; †RFL= reading food labeling; RFL 1 = When I buy a food product, I usually consult the label information; RFL 2 = On the label, I usually look at the nutritional information related to the food; RFL 3 = On the nutritional table, I usually look at the fiber content of the food; RFL 4 = The amount of fiber is a factor to consider when choosing among similar foods; RFL 5 = If I buy a food that is referred to as having a “high fiber content” or being “fiber rich” on the pack, I check the label to see the amount of fiber present.
